# Supplementary material for: New Mononuclear Cu(II) Complexes and 1D Chains with 4-Amino-4H-1,2,4-triazole
Source: MDPI journal article supplement (doi:10.3390/ijms141223597), 2013-12-03
Supplement: s1 [file s1]

Supplementary Information

**Table S1.** Selected bond lengths (Å) and angles (°) for **L**.

| *Bond lengths* | | | |
| --- | --- | --- | --- |
| N(1)–N(2) | 1.388(3) | N(8)–N(9) | 1.395(3) |
| N(1)–C(5) | 1.286(3) | N(8)–C(7) | 1.270(3) |
| N(2)–C(3) | 1.293(4) | N(9)–C(10) | 1.334(3) |
| N(4)–N(6) | 1.379(3) | N(9)–C(13) | 1.355(4) |
| N(4)–C(3) | 1.345(3) | N(11)–N(12) | 1.379(3) |
| N(4)–C(5) | 1.358(4) | N(11)–C(10) | 1.307(4) |
| N(6)–C(7) | 1.346(3) | N(12)–C(13) | 1.294(4) |
| *Bond angles* | | | |
| N(2)–N(1)–C(5) | 107.1(2) | N(8)–N(9)–C(13) | 130.6(2) |
| N(1)–N(2)–C(3) | 107.8(2) | C(10)–N(9)–C(13) | 105.2(2) |
| N(6)–N(4)–C(3) | 125.6(2) | N(12)–N(11)–C(10) | 107.8(2) |
| N(6)–N(4)–C(5) | 128.0(2) | N(2)–C(3)–N(4) | 109.2(2) |
| C(3)–N(4)–C(5) | 106.2(2) | N(1)–C(5)–N(4) | 109.6(2) |
| N(4)–N(6)–C(7) | 117.9(2) | N(6)–C(7)–N(8) | 117.0(2) |
| N(9)–N(8)–C(7) | 111.9(2) | N(9)–C(10)–N(11) | 109.9(3) |
| N(8)–N(9)–C(10) | 123.9(2) | N(9)–C(13)–N(12) | 111.1(2) |
| N(11)–N(12)–C(13) | 106.0(2) |  |  |

**Table S2.** Hydrogen bond lengths (Å) and angles (°) for **L** and **II**–**IV**.

| **Compound** | **D–H···A** | ***d*(D–H)** | ***d*(H···A)** | ***d*(D···A)** | **∠(DHA)** |
| --- | --- | --- | --- | --- | --- |
| **L** *a* | N(6)–H(6)···N(1)#1 | 0.86 | 1.99 | 2.796(3) | 156 |
| **II** *b* | N(8)–H(8A)···F(24) | 0.93 | 2.48 | 3.151(4) | 129 |
|  | N(8)–H(8B)··· F(33)#1 | 0.93 | 2.33 | 3.005(3) | 130 |
|  | N(8)–H(8B)···F(23) | 0.93 | 2.49 | 3.199(3) | 133 |
|  | N(14)–H(14B)···N(8)#2 | 0.93 | 2.42 | 3.218(3) | 144 |
| **III** *c* | N(6)–H(6A)···O(21)#1 | 0.88 | 2.22 | 3.099(3) | 173 |
|  | N(6)–H(6B)···Cl(2) | 0.88 | 2.55 | 3.379(3) | 157 |
|  | N(16)–H(16A)···Cl(1)#2 | 0.88 | 2.43 | 3.310(3) | 177 |
|  | N(16)–H(16B)···Cl(2)#3 | 0.88 | 2.38 | 3.217(3) | 158 |
|  | O(21)–H(21A)···Cl(2) | 0.88 | 2.40 | 3.206(3) | 170 |
|  | O(21)–H(21B)···Cl(2)#4 | 0.82 | 2.31 | 3.113(3) | 168 |
| **IV** *d* | N(6)–H(6A)···Cl(2)#1 | 0.88 | 2.44 | 3.301(4) | 164 |
|  | N(6)–H(6B)···F(2)#2 | 0.88 | 1.99 | 2.873(4) | 178 |
|  | N(16)–H(16A)···O(200)#3 | 0.88 | 2.08 | 2.884(5) | 152 |
|  | N(16)–H(16B)···F(1)#2 | 0.88 | 2.23 | 2.956(4) | 140 |
|  | N(16)–H(16B)···F(2)#4 | 0.88 | 2.55 | 2.983(4) | 111 |
|  | N(26)–H(26A)···F(6)#3 | 0.88 | 2.17 | 2.877(4) | 137 |
|  | N(26)–H(26B)···Cl(1)#5 | 0.88 | 2.42 | 3.262(4) | 159 |
|  | N(36)–H(36A)···N(16)#6 | 0.88 | 2.38 | 3.248(5) | 171 |
|  | N(36)–H(36B)···F(6)#6 | 0.88 | 2.05 | 2.908(5) | 166 |
|  | O(100)–H(101)···Cl(1)#7 | 0.82 | 2.42 | 3.199(4) | 160 |

**Table S2.** *Cont.*

| Compound | D–H···A | d(D–H) | d(H···A) | d(D···A) | ∠(DHA) |
| --- | --- | --- | --- | --- | --- |
|  | O(100)–H(102)···F(4)#8 | 0.82 | 2.10 | 2.855(4) | 153 |
|  | O(200)–H(201)···F(5)#6 | 0.82 | 2.01 | 2.773(5) | 155 |
|  | O(200)–H(202)···F(2) | 0.82 | 1.97 | 2.780(4) | 168 |
|  | O(300)–H(301)···F(1)#9 | 0.82 | 1.95 | 2.755(4) | 167 |
|  | O(300)–H(302)···Cl(2)#3 | 0.82 | 2.50 | 3.262(4) | 154 |

*a* Symmetry transformations used to generate equivalent atoms: #1 *x*, *y*, −1 + *z*; #2 −1 + *x*, −1 + *y*, 1 + *z*;
*b* Symmetry transformations used to generate equivalent atoms: #1 1 − *x*, 1/2 − *y*, *z*; #2 1 − *x*, –1/2 − *y*, *z*;
*c* Symmetry transformations used to generate equivalent atoms: #1 3/2 − *x*, 1/2 + *y*, −z; #2 3/2 − *x*, −1/2 + *y*,
1 − *z*; #3 3/2 − *x*, 1/2 + *y*, 1 − *z*; #4 1 + *x*, *y*, *z*; *d* Symmetry transformations used to generate equivalent atoms: #1 1 − *x*, 1 − *y*, −*z*; #2 *x*, 1 + *y*, −1 + *z*; #3 1 − *x*, 1 − *y*, 1 − *z*; #4 −*x*, 1 − *y*, 1 − *z*; #5 −*x*, 1 − *y*, 1 − *z*; #6 *x*, −1 + *y*, *z*; #7 1 + *x*, *y*, *z*; #8 1 − *x*, 2 − *y*, 1 − *z*; #9 *x*, 1 + *y*, *z*.

**Table S3.** Selected bond lengths (Å) and angles (°) for **II**.

| *Bond lengths* | | | | | |
| --- | --- | --- | --- | --- | --- |
| Cu(1)–N(3) | 2.003(2) | N(3)–N(4) | 1.389(3) | N(9)–N(10) | 1.389(3) |
| Cu(1)–N(3) c | 2.003(2) | N(4)–C(5) | 1.307(3) | N(10)–C(11) | 1.308(3) |
| Cu(1)–N(9) | 1.996(2) | N(6)–C(5) | 1.349(3) | N(12)–C(11) | 1.349(3) |
| Cu(1)–N(9) c | 1.996(2) | N(6)–C(7) | 1.354(4) | N(12)–C(13) | 1.348(4) |
| Cu(1)–O(2) | 2.264(3) | N(6)–N(8) | 1.416(3) | N(12)–N(14) | 1.413(3) |
| N(3)–C(7) | 1.310(3) | N(9)–C(13) | 1.314(4) |  |  |
| *Bond angles* | | | | | |
| Cu(1)–N(9)–C(13) | 129.8(2) | N(3)–Cu(1)–N(9) c | 89.96(9) | N(9)–Cu(1)–N(3) c | 89.96(9) |
| Cu(1)–N(3)–N(4) | 122.79(16) | N(3)c–Cu(1)–N(9) c | 89.02(9) | O(2)–Cu(1)–N(3) c | 95.40(6) |
| Cu(1)–N(3)–C(7) | 128.63(19) | O(2)–Cu(1)–N(9) | 95.45(6) | N(3)–Cu(1)–N(3) c | 169.21(9) |
| O(2)–Cu(1)–N(3) | 95.40(6) | N(3)–Cu(1)–N(9) | 89.02(9) | N(9)–Cu(1)–N(9) c | 169.10(9) |
| O(2)–Cu(1)–N(9) c | 95.45(6) |  |  |  |  |

c 1 − *x*, 1/2 − *y*, *z*.

**Table S4.** Selected bond lengths (Å) and angles (°) for **III**.

| *Bond lengths* | | | | | |
| --- | --- | --- | --- | --- | --- |
| Cu(1)···Cu(1) | 3.653(2) | N(1)–C(5) | 1.304(3) | N(11)–C(15) | 1.312(3) |
| Cu(1)–Cl(1) b | 2.7829(13) | N(1)–N(2) | 1.376(3) | N(12)–C(13) | 1.315(3) |
| Cu(1)–N(11) b | 2.007(2) | N(2)–C(3) | 1.308(3) | N(14)–C(15) | 1.350(3) |
| Cu(1)–N(12) | 2.020(2) | N(4)–C(3) | 1.349(3) | N(14)–N(16) | 1.409(3) |
| Cu(1)–N(2) | 2.012(2) | N(4)–C(5) | 1.345(3) | N(11)–N(12) | 1.374(3) |
| Cu(1)–Cl(1) | 2.6949(13) | N(4)–N(6) | 1.414(3) | N(14)–C(13) | 1.348(3) |
| Cu(1)–N(1) b | 2.0071(19) |  |  |  |  |

**Table S4.** *Cont.*

| *Bond angles* | | | | | |
| --- | --- | --- | --- | --- | --- |
| Cu(1)–Cl(1)–Cu(1) a | 83.64(3) | N(2)–Cu(1)–Cl(1) b | 92.64(6) | N(12)–Cu(1)–N(11) b | 91.76(8) |
| Cu(1)–N(12)–C(13) | 127.68(17) | Cl(1)–Cu(1)–Cl(1) b | 177.91(3) | N(12)–N(11)–Cu(1) a | 124.12(14) |
| Cu(1)–N(12)–N(11) | 124.73(14) | Cl(1)–Cu(1)–N(11) b | 95.36(6) | N(2)–Cu(1)–N(1) b | 90.10(8) |
| Cu(1)–N(2)–C(3) | 128.04(18) | Cl(1)–Cu(1)–N(12) | 88.78(6) | N(2)–Cu(1)–N(11) b | 178.50(9) |
| Cu(1)–N(2)–N(1) | 124.10(14) | Cl(1)–Cu(1)–N(2) | 85.26(6) | N(2)–Cu(1)–N(12) | 89.61(8) |
| Cl(1)–Cu(1)–N(1) b | 93.85(5) | Cl(1)b–Cu(1)–N(11) b | 86.73(6) | N(2)–N(1)–Cu(1) a | 124.39(14) |
| Cl(1)b–Cu(1)–N(1) b | 86.20(5) | N(1)b–Cu(1)–N(11) b | 88.50(8) | C(15)–N(11)–Cu(1) a | 127.01(17) |
| N(12)–Cu(1)–Cl(1) b | 91.16(6) | N(12)–Cu(1)–N(1) b | 177.32(8) | C(5)–N(1)–Cu(1) a | 127.94(14) |

a −1/2 + *x*, 3/2 − *y*, *z*; b 1/2 + *x*, 3/2 − *y*, *z*.

**Table S5.** Selected bond lengths (Å) and angles (°) for **IV**.

| *Bond lengths* | | | | | |
| --- | --- | --- | --- | --- | --- |
| Cu(1)–Cl(1) | 2.6458(15) | N(1)–C(5) | 1.314(5) | N(22)–C(23) | 1.311(5) |
| Cu(1)–N(21) | 1.996(3) | N(4)–C(5) | 1.339(5) | N(31)–N(32) | 1.388(4) |
| Cu(2)–N(31) | 2.026(3) | N(14)–N(16) | 1.414(5) | N(34)–C(33) | 1.353(5) |
| N(1)–N(2) | 1.384(4) | N(21)–C(25) | 1.307(5) | Cu(1)–N(11) | 2.022(4) |
| N(4)–C(3) | 1.356(5) | N(24)–C(25) | 1.349(5) | Cu(2)–N(1) | 1.996(3) |
| N(12)–C(13) | 1.309(5) | N(34)–N(36) | 1.421(5) | Cu(2)–N(22) a | 1.993(3) |
| N(21)–N(22) | 1.393(4) | Cu(1)–N(2) | 2.004(3) | N(4)–N(6) | 1.414(4) |
| N(24)–C(23) | 1.349(5) | Cu(2)–Cl(1) | 2.6773(15) | N(11)–C(15) | 1.310(5) |
| N(32)–C(33) | 1.306(5) | Cu(2)–N(12) a | 2.025(3) | N(14)–C(15) | 1.349(5) |
| Cu(1)–Cl(2) | 2.7198(16) | N(2)–C(3) | 1.309(5) | N(24)–N(26) | 1.412(4) |
| Cu(1)–N(32) | 2.019(4) | N(11)–N(12) | 1.386(4) | N(31)–C(35) | 1.306(5) |
| Cu(2)–Cl(2) a | 2.7232(16) | N(14)–C(13) | 1.345(5) | N(34)–C(35) | 1.344(5) |
| *Bond angles* | | | | | |
| Cu(1)–Cl(1)–Cu(2) | 85.09(4) | Cl(2)–Cu(1)–N(11) | 89.20(10) | N(31)–Cu(2)–N(12) a | 179.05(13) |
| Cu(1)–Cl(2)–Cu(2) b | 83.11(4) | N(2)–Cu(1)–N(11) | 91.65(13) | Cl(2)a–Cu(2)–N(22) a | 88.01(10) |
| Cu(1)–N(11)–C(15) | 129.4(3) | N(11)–Cu(1)–N(21) | 88.43(13) | Cl(1)–Cu(1)–N(11) | 91.52(10) |
| Cu(1)–N(11)–N(12) | 123.0(3) | Cl(1)–Cu(2)–N(1) | 87.25(10) | Cl(2)–Cu(1)–N(2) | 91.82(10) |
| Cu(1)–N(2)–C(3) | 128.3(3) | Cl(1)–Cu(2)–N(12) a | 94.92(10) | Cl(2)–Cu(1)–N(32) | 90.61(10) |
| Cu(1)–N(2)–N(1) | 123.3(2) | N(1)–Cu(2)–Cl(2) a | 92.18(10) | N(2)–Cu(1)–N(32) | 88.19(13) |
| Cu(1)–N(21)–C(25) | 128.8(3) | N(31)–Cu(2)–Cl(2) a | 92.80(10) | N(21)–Cu(1)–N(32) | 91.74(13) |
| Cu(1)–N(21)–N(22) | 123.8(2) | Cl(2)a–Cu(2)–N(12) a | 86.31(10) | Cl(1)–Cu(2)–Cl(2) a | 178.63(4) |
| Cu(1)–N(32)–C(33) | 129.0(3) | Cl(1)–Cu(1)–N(2) | 87.91(10) | N(1)–Cu(2)–N(31) | 91.25(13) |
| Cu(1)–N(32)–N(31) | 123.4(3) | Cl(1)–Cu(1)–N(32) | 88.67(10) | N(1)–Cu(2)–N(22) a | 179.77(15) |
| Cu(2)–N(1)–C(5) | 129.2(3) | Cl(2)–Cu(1)–N(21) | 87.67(10) | N(31)–Cu(2)–N(22) a | 88.87(13) |
| Cu(2)–N(1)–N(2) | 123.9(2) | N(2)–Cu(1)–N(21) | 179.48(13) | N(12)a–Cu(2)–N(22) a | 91.44(13) |
| Cu(2)–N(31)–C(35) | 129.4(3) | N(11)–Cu(1)–N(32) | 179.74(12) | C(13)–N(12)–Cu(2) b | 128.2(3) |
| Cu(2)–N(31)–N(32) | 122.3(3) | Cl(1)–Cu(2)–N(31) | 85.96(10) | C(23)–N(22)–Cu(2) b | 128.9(3) |
| Cl(1)–Cu(1)–Cl(2) | 179.24(4) | Cl(1)–Cu(2)–N(22) a | 92.56(10) | N(11)–N(12)–Cu(2) b | 122.9(3) |
| Cl(1)–Cu(1)–N(21) | 92.61(10) | N(1)–Cu(2)–N(12) a | 88.44(13) | N(21)–N(22)–Cu(2) b | 123.8(2) |

a −1 + *x*, *y*, *z*; b 1 + *x*, *y*, *z*.

**Figure S1.** Normalized FTIR spectraof **I** (black), **II** (red), **III** (blue) and **IV** (purple).

**Figure S2.** Normalised Kubelka-Munk spectra of **I** (black), **II** (orange), **III** (blue) and **IV** (purple).

© 2013 by the authors; licensee MDPI, Basel, Switzerland. This article is an open access article distributed under the terms and conditions of the Creative Commons Attribution license (http://creativecommons.org/licenses/by/3.0/).
